# 1 **BiG-MAP: an automated pipeline to profile metabolic gene cluster abundance** 2 **and expression in microbiomes**

3

4 Victoria Pascal Andreu<sup>1</sup>, Hannah E. Augustijn<sup>\*1</sup>, Koen van den Berg<sup>\*1</sup>, Justin J. J.  
5 van der Hooff<sup>1</sup>, Michael A. Fischbach<sup>2#</sup>, Marnix H. Medema<sup>#1</sup>

6

7 1. Bioinformatics Group, Wageningen University, Wageningen, the Netherlands

8 2. Department of Bioengineering and ChEM-H, Stanford University, Stanford, USA

9 \*Contributed equally

10 #Corresponding authors: [fischbach@fischbachgroup.org](mailto:fischbach@fischbachgroup.org), [marnix.medema@wur.nl](mailto:marnix.medema@wur.nl)

11

## 12 **Abstract**

13 Microbial gene clusters encoding the biosynthesis of primary and secondary  
14 metabolites play key roles in shaping microbial ecosystems and driving microbiome-  
15 associated phenotypes. Although effective approaches exist to evaluate the metabolic  
16 potential of such bacteria through identification of metabolic gene clusters in their  
17 genomes, no automated pipelines exist to profile the abundance and expression levels  
18 of such gene clusters in microbiome samples to generate hypotheses about their  
19 functional roles and to find associations with phenotypes of interest. Here, we describe  
20 BiG-MAP, a bioinformatic tool to profile abundance and expression levels of gene  
21 clusters across metagenomic and metatranscriptomic data and evaluate their  
22 differential abundance and expression between different conditions. To illustrate its  
23 usefulness, we analyzed 47 metagenomic samples from healthy and caries-  
24 associated human oral microbiome samples and identified 58 gene clusters, including  
25 unreported ones, that were significantly more abundant in either phenotype. Among  
26 them, we found the *muc* operon, a gene cluster known to be associated to tooth decay.  
27 Additionally, we found a putative reuterin biosynthetic gene cluster from a

28 *Streptococcus* strain to be enriched but not exclusively found in healthy samples;  
29 metabolomic data from the same samples showed masses with fragmentation  
30 patterns consistent with (poly)acrolein, which is known to spontaneously form from the  
31 products of the reuterin pathway and has been previously shown to inhibit pathogenic  
32 *Streptococcus mutans* strains. Thus, we show how BiG-MAP can be used to generate  
33 new hypotheses on potential drivers of microbiome-associated phenotypes and  
34 prioritize the experimental characterization of relevant gene clusters that may mediate  
35 them.

36

### 37 **Importance**

38 Microbes play an increasingly recognized role in determining host-associated  
39 phenotypes by producing small molecules that interact with other microorganisms or  
40 host cells. The production of these molecules is often encoded in syntenic genomic  
41 regions, also known as gene clusters. With the increasing numbers of (multi-)omics  
42 datasets that can help understanding complex ecosystems at a much deeper level,  
43 there is a need to create tools that can automate the process of analyzing these gene  
44 clusters across omics datasets. The current study presents a new software tool called  
45 BiG-MAP, which allows assessing gene cluster abundance and expression in  
46 microbiome samples using metagenomic and metatranscriptomic data. In this  
47 manuscript, we describe the tool and its functionalities, and how it has been validated  
48 using a mock community. Finally, using an oral microbiome dataset, we show how it  
49 can be used to generate hypotheses regarding the functional roles of gene clusters in  
50 mediating host phenotypes.

51

52 **Running title:** BiG-MAP: profiling gene clusters across microbiomes

53 **Keywords: metabolic gene cluster, metagenomics, metatranscriptomics,**  
54 **microbiome-associated phenotype**

55

## 56 **Introduction**

57 Bacteria can produce diverse sets of small molecules that interact with other microbes  
58 or with their host. These metabolites include members of both primary and secondary  
59 metabolism and cover a wide chemical diversity<sup>1,2</sup>. These pathways and metabolites  
60 are often specific to certain strains or species and help them to compete for space and  
61 resources<sup>3</sup>, e.g. through antimicrobial, nutrient-scavenging or immunomodulatory  
62 activities<sup>4</sup>. The genes that encode these pathways are often physically clustered and  
63 are also known as Biosynthetic Gene Clusters (BGCs) or Metabolic Gene Clusters  
64 (MGCs)<sup>5,6</sup>—the latter being a broader definition that also includes catabolic pathways.  
65 Several studies have indicated metabolites produced from such gene clusters to be  
66 the major drivers of specific phenotypic traits; for instance, pseudomonads in the  
67 rhizosphere of sugar beet plants were shown to produce the antifungal non-ribosomal  
68 peptide (NRP) thanamycin, which protects plants from fungal infections<sup>7</sup>. Another  
69 example from primary metabolism is trimethylamine, a diet derived-molecule that is  
70 processed by bacteria harboring a gene cluster that includes both *CutC* and *CutD*, and  
71 has been associated with an increased risk of suffering from cardiovascular disease<sup>8</sup>.  
72 Therefore, mining genomes for BGCs or MGCs enables moving the field towards a  
73 deeper understanding of function at the molecular level and determine the role a given  
74 microbe plays in the ecosystem<sup>9</sup>.

75

76 Several tools have been developed to mine genomes for these gene clusters, like  
77 antiSMASH<sup>10</sup>, gutSMASH

78 (<https://github.com/victoriapascal/gutsmash/tree/gutsmash/>) or DeepBGC<sup>11</sup>. In  
79 contrast to other tools for functional profiling of microbial communities, such as  
80 HUMAnN2<sup>12</sup>, MetaPath<sup>13</sup>, FMAP<sup>14</sup> and Metatrans<sup>15</sup>, these do not depend on pathways  
81 that are present in reference databases like KEGG<sup>16</sup> or MetaCyc<sup>17</sup>, which only include  
82 pathways for which most or all enzymatic steps have been elucidated. In fact, the  
83 majority of gene clusters identified by antiSMASH and many gene clusters predicted  
84 by gutSMASH encode pathways for which the catalytic steps, intermediates, and final  
85 products are yet unknown. However, known pathways that are encoded by gene  
86 clusters can also be reliably detected. The detection of complete gene clusters instead  
87 of individual enzyme-coding genes likely decreases false positive detections of  
88 enzymes that show sequence similarity to reference enzyme sequences but are part  
89 of different functional contexts. For these reasons, identification of gene clusters of  
90 known and unknown function provides a useful basis to look for functional  
91 explanations of microbiome-associated phenotypes of interest. As phenotypes are  
92 often triggered by metabolites at physiologically relevant concentrations, while  
93 samples without the phenotype lack these metabolites or have them at lower  
94 concentrations, assessing gene cluster abundance and expression levels across  
95 samples is crucial to predict associations with the phenotype in question. Another  
96 significant advantage of profiling the community by combining different omics data is  
97 to prioritize the characterization of putative gene clusters that are highly abundant or  
98 expressed in samples of interest and thus, help elucidating novel compounds and their  
99 biosynthetic pathways.

100

101 Here, we present designed BiG-MAP (Biosynthetic Gene cluster Meta'omics  
102 Abundance Profiler), which provides a streamlined and automated process to

103 determine BGC/MGC abundance and expression in bacterial communities by  
104 mapping metagenomic and metatranscriptomic reads to gene cluster sequences from  
105 reference genomes or metagenomic assemblies. BiG-MAP uses MinHash-based  
106 redundancy filtering and groups BGCs into families with BiG-SCAPE<sup>18</sup> to avoid  
107 ambiguous mapping, and uses these to output and visualize profiles of MGC  
108 abundance or expression levels across samples. Additionally, it calculates differential  
109 abundance or expression using either parametric or nonparametric tests. We validate  
110 the tool using simulated metagenomic data and show how MGC abundance and  
111 expression levels are accurately recapitulated. Finally, to showcase its usefulness, we  
112 applied BiG-MAP on a large publicly available metagenome dataset from the human  
113 oral microbiome and describe how it successfully identified gene clusters related to  
114 bacteria's specialized primary and secondary metabolism that are (potentially)  
115 relevant for caries development. Among others, this collection includes the previously  
116 reported *pdu* and cobalamin gene cluster involved in the reuterin synthesis and the  
117 *muc* operon, gene clusters that were predicted by gutSMASH and antiSMASH,  
118 respectively. Thus, BiG-MAP suggests new lines to explore further the onset and  
119 development of oral cavities.

120

## 121 **Results and discussion**

### 122 **An approach to map metagenomics and metatranscriptomic reads to gene** 123 **clusters**

124 BiG-MAP maps shotgun sequencing reads onto gene clusters that have been either  
125 predicted by antiSMASH<sup>19</sup> or gutSMASH (manuscript in preparation). It is a Python-  
126 based pipeline, which allows downloading datasets from SRA repository, aligning  
127 metagenomic or metatranscriptomic reads to gene clusters detected in reference

128 genome collections or in a metagenomic assembly, providing normalized counts  
129 across samples, performing differential analyses, and visualizing the results. The tool  
130 requires three main inputs: (1) a gene cluster collection obtained from running any  
131 “SMASH-based” algorithm, (2) the meta’omic dataset in FASTQ or FASTA format or,  
132 alternatively, the Sequence Read Archive (SRA) accession numbers to download it,  
133 and (3) a metadata file with sample information to segregate them into groups and  
134 compare their gene cluster content.

135

136 BiG-MAP is composed of four different modules (see Fig. 1): (1) BiG-MAP.family,  
137 which performs redundancy filtering on the input collection of predicted gene clusters  
138 and provides a set of representative gene clusters for the mapping process. (2) BiG-  
139 MAP.download, which uses a list of SRA accession ids to download the shotgun data  
140 if present in the SRA database (this step is optional). (3) BiG-MAP.map, which maps  
141 reads from the metagenomic or metatranscriptomic samples onto the set of  
142 representative gene clusters obtained from BiG-MAP.family. (4) BiG-MAP.analyse,  
143 which normalizes the counts for sparsity and sequencing depth, performs differential  
144 abundance/expression analysis and visualizes the output.

145 The BiG-MAP.family module performs a redundancy analysis on the gene cluster  
146 collection to remove almost identical sequences, in order to reduce the computing time  
147 and avoid ambiguous mapping. To achieve this, the protein sequences of the gene  
148 clusters are used as input for MASH<sup>20</sup>, a MinHash-based algorithm to estimate  
149 sequence distance. Next, a representative gene cluster is selected using medoids  
150 calculation. The resulting representatives are then clustered into Gene Cluster  
151 Families (GCFs) using BiG-SCAPE<sup>18</sup>, an algorithm that uses three different distance  
152 metrics to group MGCs into families based on sequence and architectural similarity.

153 This step helps to group more distantly related homologous gene clusters that likely  
154 have the same chemical products but that are encoded in more distantly related  
155 organisms. In such cases, BiG-MAP maps reads to the family representatives  
156 separately, but also allows reporting combined abundance or expression levels per  
157 family to find associations with phenotypes at a higher level. In order to set an  
158 expression baseline when using metatranscriptomic data, BiG-MAP screens bacterial  
159 genomes whose gene clusters have been included in the non-redundant  
160 representative set of gene clusters for five house-keeping genes known to have stable  
161 expression levels using HMMer (for details, see Methods section titled *BiG-*  
162 *MAP.family: Creating a non-redundant MGC representative collection*). Next, the  
163 reads are mapped to the representative gene clusters using the short-read aligner  
164 Bowtie2<sup>21</sup>. The obtained raw read counts are then converted to RPKM (Reads Per  
165 Kilobase Million) values, which are averaged over the GCF size (based on BiG-  
166 SCAPE clustering). In the last module, RPKM values are then normalized using  
167 Cumulative Sum Scaling<sup>22</sup> (CSS) to account for sparsity. Moreover, for each aligned  
168 gene cluster we assess its coverage to control for gene clusters that are only partially  
169 mapped to by meta'omic reads. We report two coverage values in the intermediate  
170 files; one for the whole gene cluster and the other considering only the core genes of  
171 the BGC/MGC; showing both these numbers is often insightful in cases where borders  
172 of gene clusters called by antiSMASH or gutSMASH are imprecise and reads may be  
173 mapped to regions flanking the actual gene cluster. Subsequently, BiG-MAP detects  
174 differentially abundant or expressed gene clusters by using either zero-inflated  
175 gaussian distribution mixture models (ZIG-models) or using a Kruskal-Wallis model.  
176 Finally, all the generated results are displayed into a plot that includes a heatmap for  
177 the gene clusters abundance/expression values, a bar plot for the log fold change, the

178 coverage values and finally another heatmap for the housekeeping gene expression  
179 values when analyzing metatranscriptomes (see Suppl. Fig. S2). The output folders  
180 contain different intermediate and final results as for instance the BiG-SCAPE results,  
181 the resulting bedgraphs, the raw and normalized RPKM counts for each sample (in  
182 BIOM format<sup>23</sup>) and after applying the fitZIG and Kruskal Wallis tests in tab-separated  
183 tables and mapping coverage values for each gene cluster and sample. Altogether,  
184 this tool presents a streamlined method to functionally profile meta'omics data by  
185 mapping reads to known or putative gene clusters.

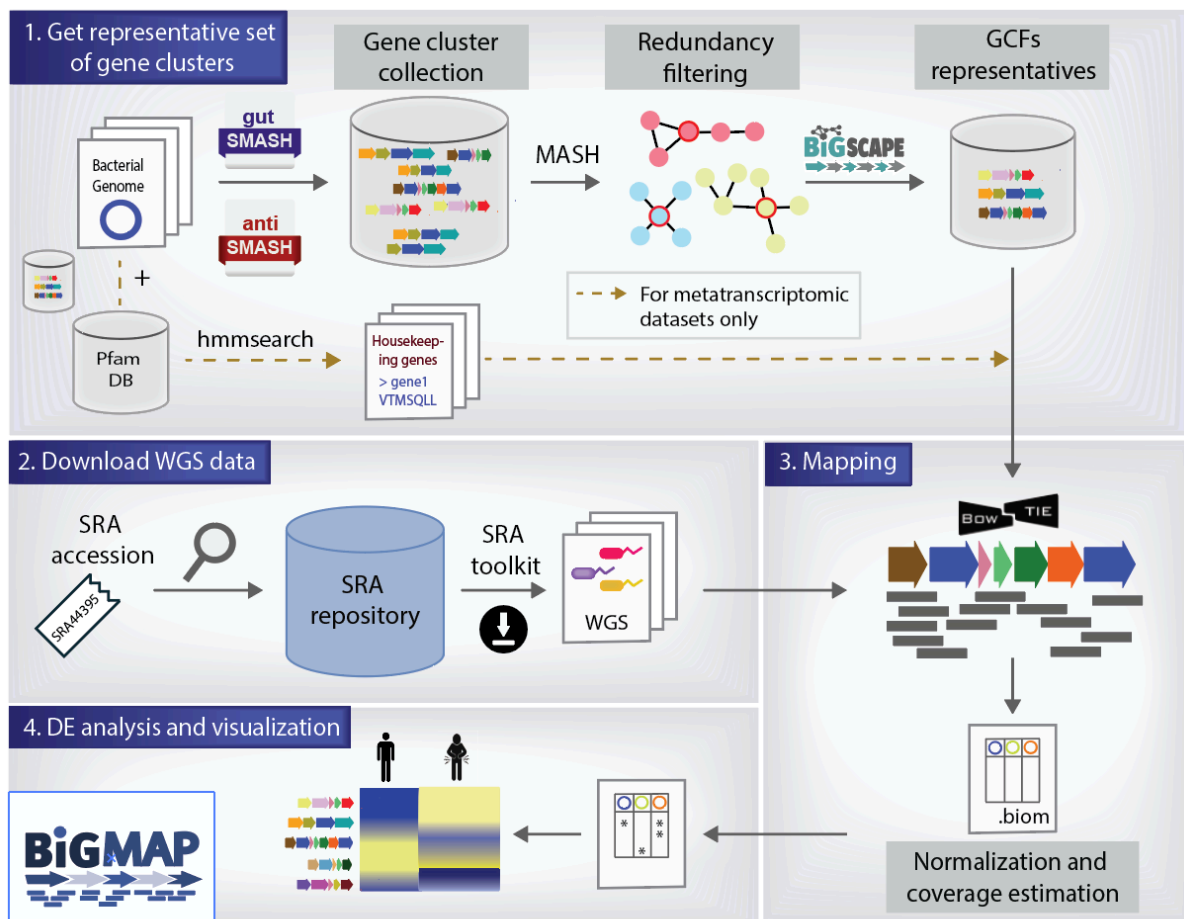

186 GCF (Gene Cluster Family), WGS (Whole Genome Sequencing), DE (Differential Expression)

187 **Figure 1. BiG-MAP workflow.** BiG-MAP is composed of four different modules: (1)  
188 BiG-MAP.family returns a representative set of non-redundant gene clusters based on  
189 sequence similarity, given a set of predicted gene clusters by either gutSMASH or  
190 antiSMASH. This module also looks for the protein sequences of 5 housekeeping



191 genes from the bacteria encoding the representative gene clusters when reads from  
192 metatranscriptomic sequences are going to be used. (2) BiG-MAP.download  
193 downloads a set of metagenomes/metatranscriptomes based on their SRA  
194 accessions. (3) BiG-MAP.map aligns omics reads to the representative set of gene  
195 clusters using Bowtie and (4) BiG-MAP.analyse computes normalized read counts,  
196 performs differential abundance/expression analysis of gene clusters across different  
197 conditions, and visualizes the results (see Suppl. Fig S1 and S2 as an example).

198

### 199 **Assessing and validating BiG-MAP performance using simulated data**

200 In order to evaluate the overall performance of BiG-MAP and in particular, all the  
201 default parameters chosen as defaults, such as the Bowtie alignment mode and the  
202 MASH similarity score cut-off, we designed a mock microbial community for  
203 metagenome simulation. From the Culturable Genome Reference (CGR) genome  
204 collection<sup>24</sup>, we randomly chose 101 CGR genomes to simulate metagenome reads  
205 from and to use as input for gutSMASH. To assess the impact of different sequencing  
206 depths (coverage of 0.5x and 0.05x) and community structure (uniform, linear, power-  
207 law and exponential), we simulated eight different metagenomic libraries. Since the  
208 gene cluster content and their abundance levels in simulated data is known (ground  
209 truth), this allowed us to assess the recall and precision of the BiG-MAP assignments  
210 using MASH dissimilarity scores ranging from 10-100 and the eight different alignment  
211 modes available in Bowtie across the eight different simulated data libraries. From  
212 these results we computed the F1-score or harmonic mean of precision and recall (see  
213 Fig. 2), which showed that the community structure slightly affects BiG-MAP results.  
214 Moreover, since the highest F1 scores were obtained when using MASH score cut-off  
215 (similarity) of 0.8 and using “fast” alignment mode (end-to-end), we set these

216 parameters as defaults. Still, the user is able to change them as desired by indicating  
217 it with the appropriate flag when running BiG-MAP.  
218

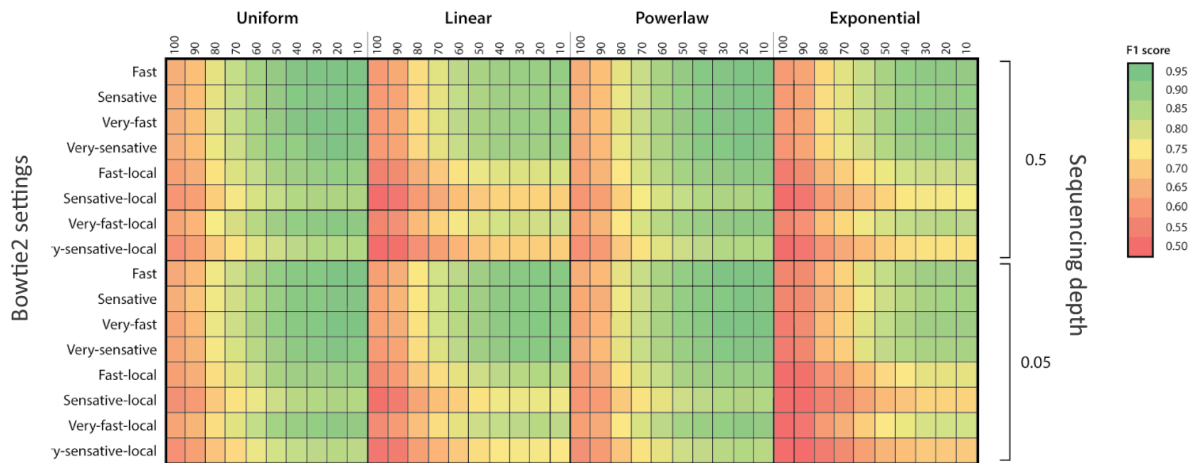

219  
220 **Figure 2. BiG-MAP validation using simulated metagenomes.** F1 score heatmap  
221 using simulated metagenomes constructed to assess the best MASH dissimilarity cut-  
222 off across four different microbial community structures, two different sequencing  
223 depth values and eight different Bowtie alignment modes.

224  
225 **Analysis of the oral microbiome: revealing the presence of gene clusters**  
226 **associated with health and disease**

227 The oral cavity is a natural habitat for many bacteria that reside in or on the gingival  
228 sulcus, tongue, teeth and cheeks, among other surfaces. These bacteria take part in  
229 important processes such as initial digestion of food, but are also associated with  
230 several oral diseases such as caries<sup>25</sup> and periodontitis<sup>26</sup>. It is known that these  
231 bacteria can organize themselves to form biofilms, which can play a causal role in the  
232 development of these diseases<sup>27</sup>. There are different functional and metabolic  
233 pathway alterations that have been associated with the onset of disease via the  
234 production of small molecules<sup>28,29,30,31</sup>. For instance, tetramic acid produced by the

235 caries-associated bacterium *Streptococcus mutans* has been linked to tooth decay<sup>32</sup>.  
236 For this reason, in order to functionally profile these oral communities and acquire  
237 further insights into the MGCs that might be involved, we studied a dataset of 47 oral  
238 microbiome samples<sup>30</sup> for which paired metagenomics and metabolomics data have  
239 been acquired and further analyzed using BiG-MAP (see *Methods Assessing the pdu*  
240 *operon abundance by surveying different oral metagenomic samples* and *Evaluating*  
241 *the presence of the muc operon in caries-associated metagenomes* sections).  
242  
243 To evaluate possible molecular mechanisms underpinning caries formation, we first  
244 analyzed the available MS/MS data together with the metabolite feature abundance  
245 table using Pathway Activity Level Scoring (PALS)<sup>33</sup>, which uses molecular families  
246 obtained using molecular networking<sup>34</sup> to group similar metabolites, and PLAGES<sup>35</sup> to  
247 find differentially expressed metabolite groups between two conditions. PALS showed  
248 a very consistent and strong differential abundance between healthy and caries  
249 volunteers of a number of features in a metabolite group that we could annotate with  
250 polymer-like structures based on their C<sub>3</sub>H<sub>4</sub>O mass differences. With MASST  
251 searches<sup>36</sup> across all public data present in GNPS-MassIVE, we could confirm the  
252 occurrence of these differential features in various microbial, human, and  
253 environmental-related public datasets (see *Methods* and *Supplementary Methods* for  
254 further information on the metabolomics data analysis). Based on the above  
255 information, we concluded that these polymer-like structures might well represent  
256 molecules called polyacroleins (metabolite identification level 3 - annotated compound  
257 class), which are known to spontaneously form from a component of the antimicrobial  
258 set of molecules called reuterin<sup>37</sup>, and which have a matching mass difference  
259 between different polymer lengths. The formation of (poly)acrolein has been shown to

260 contribute strongly to the antimicrobial activity of reuterin<sup>37</sup>. Reuterin is produced by  
261 lactobacilli from a genomic island containing a *pdu-like* operon together with a  
262 cobalamin biosynthetic gene cluster<sup>38</sup>. Of note, acrolein is an ubiquitous compound  
263 that can be found in the human body for various reasons, such as the endogenous  
264 production of it, the ingestion of different food sources or due to exposure to different  
265 environmental conditions<sup>39</sup>. There are various known routes that can converge into  
266 the formation of acrolein, as it can be formed spontaneously from glycerol and 3-  
267 hydroxypropionaldehyde<sup>37</sup>. Furthermore, glycerol metabolism from gut bacteria has  
268 also been found to produce this molecule<sup>40</sup>. Typically, the acrolein polymerization  
269 occurs under alkaline conditions<sup>41</sup>, thus, it is more likely to accumulate in saliva from  
270 healthy samples, as caries typically acidifies the oral cavity. Indeed, our results show  
271 that the possible polyacroleins are more abundant in samples of healthy volunteers.  
272 Interestingly, the presence of acrolein has been linked to inhibition of *Streptococcus*  
273 *mutans*, a well-known cariogenic bacteria<sup>42,43</sup>.

274

275 Based on these findings, we were motivated to look for the presence of the *pdu* operon  
276 in the metagenomics samples, in order to identify candidate MGCs that might be  
277 involved in acrolein formation. To this end, we ran gutSMASH on the 1,440 genomes  
278 from the Human Microbiome Oral Database (HMOD, <http://www.homd.org/>) available  
279 in April 2020. Interestingly, gutSMASH identified a *pdu-like* operon in the genome of  
280 *Streptococcus sp. F0442* that also includes a cobalamin (vitamin B12) biosynthetic  
281 region and is architecturally similar (cumulative Blast bit score of 13,271) to the  
282 *Lactobacillus reuteri* one (see Fig. 3A). Therefore, to assess the abundance of the  
283 predicted gene clusters in the oral microbiome we used our gutSMASH run, which  
284 predicted 3,352 gene clusters, as input for the BiG-MAP.family module, to filter out

285 redundant MGCs. Next, the reads of the 47 oral metagenomes (24 healthy and 23  
286 caries-related) were mapped onto the 1,544 representative gene clusters using BiG-  
287 MAP.map and the counts were further normalized and parsed with BiG-MAP.analyse.  
288 We found that 56 gene clusters predicted by gutSMASH were significantly differentially  
289 abundant between caries-related and healthy samples when using Kruskal Wallis.  
290 Despite the fact that the *pdu* operon was not among these, we could see that it was  
291 still somewhat more abundant in healthy samples (mean: 5.30 RPKM counts/sample)  
292 when compared to the diseased group (mean: 4.16 RPKM counts/sample). Motivated  
293 by this, we sought to assess its presence in a larger oral microbiome dataset by using  
294 48 paired publicly available paired-end metagenome samples, which also included  
295 metagenomes from samples suffering from periodontitis and plaque formation, all  
296 considered as disease-related samples. These were used in combination with the  
297 already analyzed ones, making a total of 96 samples; 33 caries-related, 34 healthy,  
298 10 periodontitis-related and 19 involved in plaque development and all were used as  
299 input for BiG-MAP (see Methods section titled *Assessing the pdu operon abundance*  
300 *by surveying different oral metagenomic samples*). From this run, we found 164 gene  
301 clusters differentially abundant between groups (using Kruskal Wallis test), and the  
302 *pdu* operon was among them. While healthy samples on average have 5.15 RPKM  
303 counts/sample mapping to this gene cluster, diseased ones have 3.05 (p-value=  
304 0.0004 using Kruskal Wallis). We also evaluated the coverage of the read mapping  
305 within the expanded metagenomic datasets and found that within healthy samples,  
306 not all samples contain this gene cluster. For instance, from 34 healthy samples in the  
307 extended dataset, we could find 15 of them that appear not to have the *Streptococcus*  
308 *sp. F0442 pdu* operon (coverage below 0.5), while the rest had fairly high coverage  
309 scores with a mean coverage value of 0.79 (selecting the samples with coverage

310 values of at least 0.5), implying the presence of this operon or a close homologue of  
311 it (see Fig. 3B). Overall, this MGC constitutes a potential source for polyacrolein  
312 production, and the hypothesis that it could be involved in inhibition of *Streptococcus*  
313 *mutans* strains in non-acidic conditions is intriguing. As, logically, expression of the  
314 MGC would be required for conferring a metabolic and potentially disease-suppressive  
315 phenotype, metatranscriptomics analysis of samples where putative polyacrolein  
316 accumulation is observed could be an interesting follow-up analysis in the future to  
317 test the hypothesis of the involvement of this MGC in its production. Additionally, more  
318 detailed chemical analysis of the putative polyacroleins is required to confirm their  
319 structural identity. Nonetheless, this analysis illustrates how BiG-MAP analysis,  
320 especially when combined with complimentary omics data such as metabolomics, can  
321 generate concrete and relevant hypotheses about microbiome-associated phenotypes  
322 that can be tested in the laboratory.

A

*Streptococcus* sp. F0442 | KB373314.1 | gutSMASH-predicted *pdu* operon

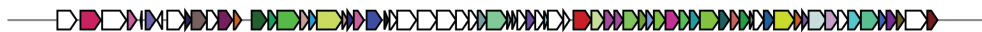

*Lactobacillus reuteri* JCM 1112 | AP007281.1 | *pdu* operon

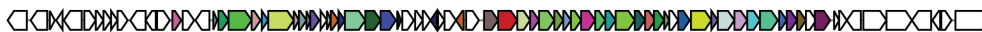

B

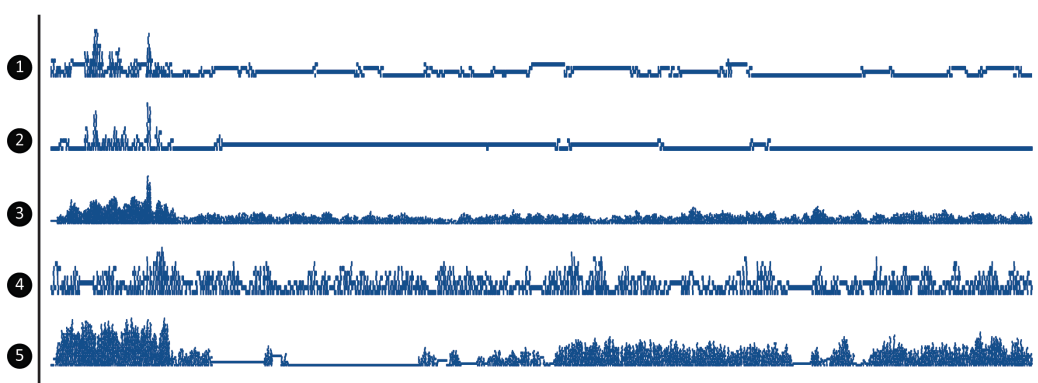

○ *pdu* metabolic genes      ● Cobalamin biosynthetic genes

323

324 **Figure 3. Detection of a *pdu* / cobalamin operon in healthy oral metagenomes.**

325 (A) MultiGeneBlast comparison between the *pdu* operon found in *Streptococcus sp.*  
326 *F0442* by gutSMASH and the characterized one from *Lactobacillus reuteri*  
327 (AP007281). (B) Read coverage of five randomly chosen healthy metagenomes along  
328 the gutSMASH-predicted *pdu* gene cluster. The coverage graphs, which were plotted  
329 using the Sushi R package (version 3.5.1)<sup>44</sup>, show that some samples (3 and 4)  
330 contain reads that cover the whole gene cluster, while in other samples, reads hardly  
331 cover the cluster (1 and 2) or only part of it (5).

332

333 Another example of a gene cluster that has been found relevant in the oral cavity is  
334 the *muc* operon, which has been shown to be responsible for the production of tetramic  
335 acid, which is known to inhibit the colonization of commensal bacteria in the oral cavity.  
336 This gene cluster encodes a hybrid between a polyketide synthase and nonribosomal  
337 peptide synthetase (PKS/NRPS)<sup>32</sup>. In order to further test this association and assess  
338 the abundance of the *muc* operon in the oral cavity, a collection of 170 *Streptococcus*  
339 *mutans* genomes collected from Tang *et al.*<sup>32</sup> and Liu *et al.*<sup>45</sup> was run through  
340 antiSMASH<sup>10</sup>, which predicted a total of 1,849 BGCs. After obtaining 41 representative  
341 gene clusters with BiG-MAP.family module, reads from the 47 oral microbiome  
342 metagenomes were mapped onto the predicted gene clusters and further processed  
343 using BiG-MAP.map and BiG-MAP.analyse subsequently. From the results, two gene  
344 clusters were found to be significantly differentially abundant between healthy and  
345 disease samples when using the fitZIG model: an NRPS from *Streptococcus mutans*  
346 N29 and the *muc* operon from *Streptococcus mutans* 14D. The *muc* operon from this  
347 strain shows high similarity to the one characterized by Tang *et al.*<sup>32</sup> (Cumulative Blast  
348 bit score of 9,056) (see Fig. 4A). However, the mean read core coverage in both



349 groups is low; 0.283 in healthy and 0.372 in caries-associated samples, which imply  
350 the presence of some of the *muc* operon genes but not the complete gene cluster (see  
351 Fig. 4B). Nonetheless, within both groups we see that some samples have reads  
352 mapping to the complete gene cluster, with coverages values close to 1. When filtering  
353 out samples with coverage values  $< 0.5$ ; leaving only 6 samples in each group, the  
354 mean coverage rises to 0.803 in healthy and 0.991 in disease. This is because there  
355 are nine healthy samples that have a core coverage value of 0 and also five disease  
356 samples that do not have reads mapping to the core genes of the *muc* operon.  
357 Interestingly, depending at which stage you check which group is more enriched with  
358 this gene cluster—either before or after normalization and depending on which  
359 differential abundance test you apply—one group or the other seems to have higher  
360 counts. The average abundance of raw RPKM counts in healthy is 16854.08  
361 compared to 12815.69 in disease samples. After being normalized, healthy samples  
362 have on average 11.22 RPKM counts/sample, slightly lower than the disease group  
363 that has 11.28 RPKM counts/sample. When using the two available differential  
364 abundance testing methods, we see that when applying the fitZIG model the difference  
365 in abundance between healthy and disease samples is significant (more abundant in  
366 disease) but not when testing it with Kruskal-Wallis. This is illustrated in the fitZIG BiG-  
367 MAP output heatmap (Suppl. Fig. S3), which shows that despite the *muc* operon is  
368 significantly more abundant in disease samples, the abundance of this gene cluster  
369 across all samples is generally very similar. Therefore, despite finding this operon  
370 being more abundant in caries-prone samples when applying the fitZIG model,  
371 suggesting that indeed the *muc* operon plays a role in the caries development, the oral  
372 microbiota from healthy donors seem to also harbor this PKS/NRPS. Hence, the  
373 microbiota from healthy samples may have a mechanism to counteract the inhibiting



374 effect of tetramic acid, or there might be a difference in expression of the gene cluster  
375 between healthy and diseased subjects.

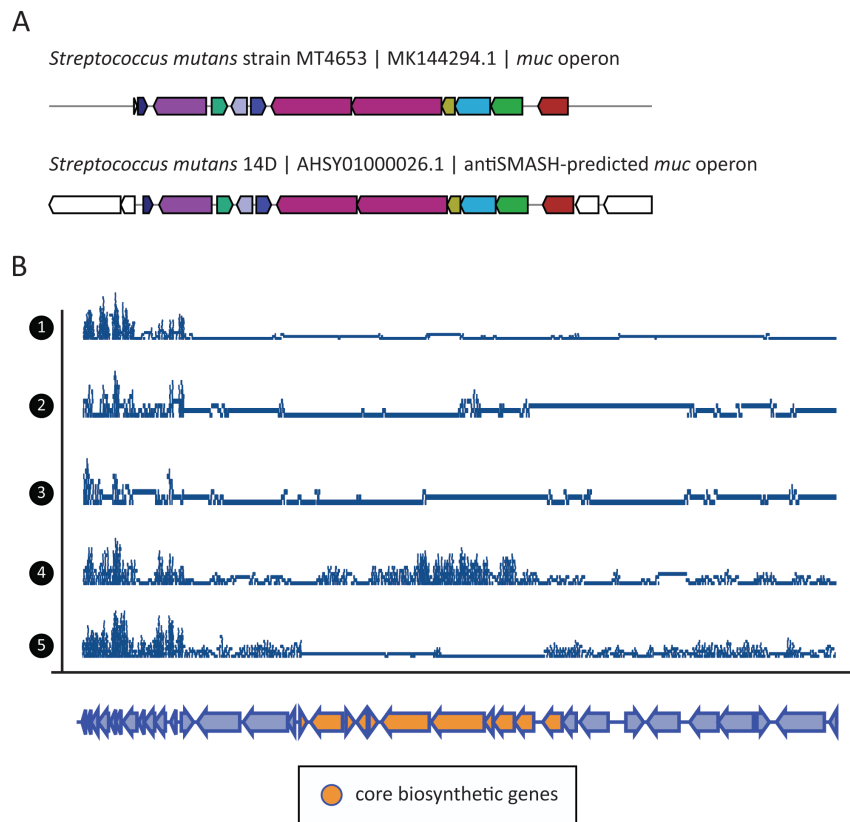

376

377

378 **Figure 4. Detection of the *muc* operon in a subset of caries-associated samples.**

379 (A) MultiGeneBlast comparison between the *muc* operon characterized from

380 *Streptococcus mutans* strain MT4653.1 and the antiSMASH predicted one from

381 *Streptococcus mutans* 14D. (B) Read coverage of five random chosen caries-related

382 metagenomes along the antiSMASH predicted *muc* gene cluster. The coverage

383 graphs, which were plotted using the Sushi R package (version 3.5.1)<sup>44</sup>, show that

384 despite the fact that the *muc* operon is generally not very highly covered by reads from

385 the randomly picked examples, some seem to truly contain for this operon, such as

386 sample 4, where the core biosynthetic genes look to be abundant at sufficient levels.

387 Full data pertaining all samples can be found in Fig. S3.

388

389 In addition, we also assessed the presence of the *muc* operon in the extended dataset  
390 that includes 96 metagenomic samples in total (see *Evaluating the presence of the*  
391 *muc operon in caries-associated metagenomes* Methods section). However, neither  
392 the *muc* nor the other BGCs predicted from the *Streptococcus* genomes were  
393 significantly more abundant in either group. This could be explained because within  
394 the 96 samples there are not only healthy or caries-associated metagenomes but also  
395 metagenomes from patients suffering from periodontitis and samples from a study that  
396 observes how a biofilm evolves over time; therefore, it might be that the community  
397 structure of all these samples differ quite a lot in terms of BGC content but also  
398 regarding the presence of *Streptococcus mutans*. All in all, our results suggest that  
399 the abundance of the *muc* operon is not very predictive for a healthy or disease state  
400 of the microbiome by itself, and other factors likely play (more) important roles.

401

## 402 **Conclusions**

403 Overall, combining different omics datasets is a very useful approach to understand  
404 which microbes are doing what and poses a promising avenue to better understand  
405 complex biological processes. Here, we presented BiG-MAP, a command-line tool that  
406 it is able to profile the abundance and expression of a collection of gene clusters  
407 across metagenomic and metatranscriptomic data. Each of the steps in the BiG-MAP  
408 pipeline is robust, as demonstrated using simulated metagenomes. Indeed, BiG-MAP  
409 can discover interesting and relevant potential associations between genomic regions  
410 and phenotypes, which can guide experimental efforts to test MGC function. It is worth  
411 noting the usefulness of the gene cluster mapping coverage values, since they allow  
412 the user to discern between the real presence of predicted gene clusters of interest  
413 and spurious read mapping. Also, the associations that can be found using BiG-MAP

414 strongly depend on the WGS data sequencing depth and sample size, as for instance  
415 in the examples described in our study, we found both gene clusters (*pdu-like* operon  
416 and *muc*) only significant in either dataset (reduced or extended one). Moreover, from  
417 the BiG-MAP output folders, which include raw and processed results, it is possible to  
418 extract valuable information, such as the differences within groups, distribution of  
419 reads across a gene cluster, raw and normalized RPKM counts, etc. Overall, we  
420 believe BiG-MAP will help researchers solving biologically complex questions by  
421 integrative multi-omics approaches, to obtain deeper insights into the relationships  
422 between microbial metabolic capacities and microbiome-associated phenotypes.

423

## 424 **Methods**

### 425 **Code availability**

426 BiG-MAP is implemented in Python 3 as a command line package. It consists of four  
427 modules: `BiG-MAP.download`, `BiG-MAP.family`, `BiG-MAP.map`, and `BiG-`  
428 `MAP.analyse`. The code is available at: <https://github.com/medema-group/BiG-MAP>  
429 together with documentation on how to install BiG-MAP and its dependencies and a  
430 short tutorial on how to run it.

431

### 432 **BiG-MAP.download: Data collection**

433 This module allows to retrieve sequencing data present in the SRA database using  
434 the SRA toolkit (<https://github.com/ncbi/sra-tools>). To initially develop, test and  
435 validate this, we used an IBD cohort that contains metagenomic and  
436 metatranscriptomic data from 78 individuals, 21 suffering from UC, 46 individuals with  
437 CD, and 11 healthy samples<sup>46</sup>. These samples were retrieved using the SRA

438 accession IDs under BioProject PRJNA389280 tool (see Suppl. Fig S1 and S2  
439 generated from this dataset).

440

#### 441 **BiG-MAP.family: Creating a non-redundant MGC representative collection**

442 The family module uses as input a directory that contains the gene cluster prediction  
443 outputted by the antiSMASH<sup>47</sup> or gutSMASH algorithms  
444 (<https://github.com/victoriapascal/gutsmash>). The predicted gene clusters are then  
445 subjected to a redundancy filtering step based on their mutual sequence similarity. For  
446 that, the protein sequences of the gene clusters are extracted and used as input for  
447 MASH<sup>20</sup> sketch, which creates sketches from the raw sequences. The sketches are  
448 then used to calculate the distances between sequences using MASH dist. The  
449 resulting tab-delimited file with the pairwise distance comparisons is used to group  
450 together gene clusters with above a 0.8 default similarity cut-off (see Figure 2). Next,  
451 to pick the best representative of each group, medoids are computed (see formula  
452 below). For this, a distance matrix is created comparing all distances between pairs of  
453 gene clusters; the one with minimal cumulative distance value is picked as  
454 representative of that group. Additionally, the selected gene clusters are subjected to  
455 another round of clustering using BiG-SCAPE<sup>18</sup>, to group gene clusters into GCFs at  
456 a 0.3 similarity cut-off (default value), from which a random representative is picked.

457

$$458 \quad x_{medoid} = \underset{y \in \{x_1, x_2, \dots, x_n\}}{\operatorname{argmin}} \sum_{i=1}^n d(y, x_i)$$

459

460 If metatranscriptomes will be used in the BiG-MAP.map module, an additional step is  
461 performed to set an expression baseline. For this, the protein sequences of the

462 genomes whose gene clusters form the non-redundant representative gene cluster  
463 collection are scanned using hmmsearch (hmmsearch version 3.1b2) for five  
464 housekeeping-coding proteins: DNA gyrase A (PF00521), DNA gyrase B (PF00204),  
465 Recombinase A (PF00154), DNA directed RNA polymerase A (PF01000), and DNA  
466 directed RNA polymerase B (PF00562). The selection of these Pfam domains was  
467 based on the findings by Rocha *et al.*<sup>48</sup> that these housekeeping genes show highly  
468 stable expression across samples. Next, the gathered protein sequences are also  
469 used as queries in the mapping module to align metatranscriptomic reads to gene  
470 clusters.

471

#### 472 **BiG-MAP.map: mapping reads to a non-redundant gene cluster collection**

473 This module relies on Bowtie2<sup>21</sup> (version 2.3.4.3) to align reads to a given sequence.  
474 From the reference gene cluster sequences selected by the medoid calculation,  
475 Bowtie index files are created. Next, Bowtie2 aligns reads to these index files that by  
476 default uses the fast alignment mode. The resulting alignment is stored in SAM format  
477 and converted to BAM format to later be parsed by SAMtools<sup>49</sup> (version 1.9). The  
478 alignments are then sorted by leftmost coordinates, the aligned reads are counted and  
479 corrected by GCF and gene cluster size consecutively. Later, the corrected raw counts  
480 are converted to TPM counts (Transcripts Per Kilobase Million) and consecutively to  
481 RPKM (Reads Per Kilobase Million) counts to account for sequencing depth.

482

483 Another functionality that was added in this module was to compute the read coverage  
484 of each gene cluster using the coordinates in the sorted BAM files. To do so, the sorted  
485 alignment files are converted to bedgraphs using BEDtools<sup>50</sup> (v2.28.0), that allow to  
486 estimate the number of covered bases of each cluster (*coverage*) by subtracting the

487 number of non-covered bases (*ncb*) to the length of each cluster (*cl*) as indicated in  
488 the formula below.

$$489 \quad \text{coverage} = \frac{cl - ncb}{cl}$$

490

491 The same procedure is followed to compute the RPKM counts and the coverage of  
492 the core genes within a gene cluster, which strictly considers the core metabolic genes  
493 within each gene cluster. This information is taken from the antiSMASH/gutSMASH  
494 (or any other “SMASH” related algorithm) Genbank output files that flag the key coding  
495 genes that are needed for the synthesis of a given molecule. Once the core genes are  
496 identified, the alignment information concerning them is retrieved using SAMtools.  
497 Next, in the same manner as RPKM are computed for the whole gene clusters, reads  
498 aligned to the core region are pulled out, counted and corrected to finally get the RPKM  
499 counts. To perform the coverage calculation, the locations of the core genes are  
500 extracted from the bedgraph to evaluate the coverage score using the aforementioned  
501 formula.

502

### 503 **BiG-MAP.analyse: Normalization of RPKM counts and finding differentially** 504 **expressed/abundant MGCs**

505 In order to account for sparse high-throughput sequencing RPKM are normalized  
506 using Cumulative Sum Scaling (CSS) from the R Bioconductor package  
507 MetagenomeSeq<sup>22</sup>. BiG-MAP offers two different statistics to account for differentially  
508 abundant/expressed gene clusters, the parametric zero inflated gaussian distribution  
509 mixture model (ZIG-models) that assumes normal distribution of values or the non-  
510 parametric Kruskal-Wallis test. Relatively small changes in gene cluster  
511 abundance/expression are expected thus, ZIG-model values are adjusted with log2

512 fold-change that ultimately helps fitting the model to a log-normal distribution.  
513 Alternatively, Kruskal-Wallis can be run on the normalized RPKM counts, which allows  
514 to assess whether the distribution of ranks for one group significantly differs from the  
515 distribution of ranks for the other group. Additionally, FDR correction is applied to  
516 correct for multiple hypothesis testing. Finally, heatmaps are produced to visualize the  
517 results using the Seaborn python package (<https://github.com/mwaskom/seaborn>).

518

### 519 **Testing BiG-MAP performance using a mock community**

520 To test BiG-MAP performance, 101 bacterial genomes were randomly chosen from  
521 the CGR collection<sup>24</sup>. Thus, the gutSMASH-predicted MGCs from each genome were  
522 used as ground truth (<https://github.com/victoriapascal/gutsmash>, version 0.8, github  
523 commit stamp: 569e860). Next, paired-end reads were generated with a mean read  
524 length of 100 bp from the 101 CGR bacterial genomes using Grinder v0.5.3<sup>51</sup>. Two  
525 different read coverage thresholds were used (0.5x and 0.05x) in combination with  
526 four different community structures: uniform, linear, power-law and exponential. Both  
527 the MGCs and the simulated reads were used as input for BiG-MAP, which was run  
528 ranging the MASH similarity thresholds between 10-100% in intervals of 10% along  
529 the eight different Bowtie2 alignment modes. From each individual run, true positive,  
530 false positive and false negatives rates were calculated to evaluate the precision and  
531 recall, which was ultimately used to compute the harmonic mean of precision and  
532 recall, also known as the F1-score. The results were plotted in a heatmap using the  
533 ComplexHeatmap package in R<sup>52</sup>.

534

535 **Assessing the *pdu* operon abundance by surveying different oral metagenomic**  
536 **samples.**

537 To find possible leads on metabolic perturbances between healthy and caries-related  
538 samples, the processed mass spectra (MGF format) and metabolomics feature tables  
539 from Aleti, G. *et al.*<sup>30</sup> were downloaded from GNPS-MassIVE<sup>34</sup> accession ID  
540 MSV000081832 to perform re-analysis. Feature-based Molecular Networks<sup>53</sup> were  
541 run using GNPS release version 21  
542 ([https://gnps.ucsd.edu/ProteoSAFe/status.jsp?task=ef4f64542ab24a7fb0802ceacbcf](https://gnps.ucsd.edu/ProteoSAFe/status.jsp?task=ef4f64542ab24a7fb0802ceacbcfa071)  
543 [a071](https://gnps.ucsd.edu/ProteoSAFe/status.jsp?task=ef4f64542ab24a7fb0802ceacbcfa071),  
544 [https://gnps.ucsd.edu/ProteoSAFe/status.jsp?task=9c95754d1fdc42b4a43b16919c3](https://gnps.ucsd.edu/ProteoSAFe/status.jsp?task=9c95754d1fdc42b4a43b16919c398ecd)  
545 [98ecd](https://gnps.ucsd.edu/ProteoSAFe/status.jsp?task=9c95754d1fdc42b4a43b16919c398ecd)). The resulting molecular family information together with the metabolite feature  
546 tables and sample information (metadata) were loaded into PALS  
547 (<https://pals.glasgowcompbio.org/app/>)<sup>33</sup>, to identify metabolite families differing in  
548 activity between healthy and caries-related samples. From the results, three out of  
549 seven candidate metabolites in one differentially expressed molecular family showing  
550 clear different abundance patterns between healthy and caries samples were further  
551 examined using GNPS MASST (<https://masst.ucsd.edu>)<sup>36</sup>, the ChemCalc MF finder<sup>54</sup>,  
552 and PubChem<sup>55</sup>, leading to the putative annotation of polyacrolein-related metabolites  
553 in healthy samples, which may be produced from a *pdu-like* operon that requires the  
554 presence of the cobalamin biosynthetic genes (see Supplementary material for further  
555 information).

556

557 For the analysis of the *pdu* operon and its presence in the oral microbiome, 1,440 oral  
558 bacteria genomes were downloaded from the HOMD collection  
559 ([http://www.homd.org/?name=GenomeList&link=GenomeList&type=all oral](http://www.homd.org/?name=GenomeList&link=GenomeList&type=all%20oral)). Next,  
560 these genomes were used as input for gutSMASH (version 0.8). The comparison  
561 between the two *pdu* operons from *Lactobacillus reuteri* (AP007281) and



562 *Streptococcus sp. F0442* (GCA\_000314795.2) was done using MultiGeneBlast<sup>56</sup>.  
563 Next, all predicted gene clusters were used as input for the BiG-MAP family module.  
564 At the same time, the oral metagenomics datasets were downloaded using the BiG-  
565 MAP.download module by providing the SRA accession IDs associated to the  
566 PRJNA478018, PRJNA396840, and PRJNA398963 BioProject IDs. Once the  
567 metagenomes were downloaded, BiG-MAP.map was run using the output of the family  
568 module and the metagenomic reads in fastq format. Finally, the RPKM counts were  
569 normalized, processed and visualized using BiG-MAP.analyse.

570

### 571 **Evaluating the presence of the *muc* operon in caries-associated metagenomes**

572 AntiSMASH was used to predict BGCs from a total of 170 *Streptococcus mutans*  
573 genomes reported in Tang *et al*<sup>32</sup> and Liu *et al*<sup>45</sup>. Within the predicted BGCs, the *muc*  
574 operon was found and compared to the *muc* operon characterized by Hao *et al*.<sup>57</sup>  
575 using MultiGeneBlast<sup>56</sup>. The predicted BGCs were then used as input for the BiG-  
576 MAP.family module. Both, the representative BGCs and metagenomic reads were  
577 then used as input in the subsequent BiG-MAP.map mapping module using the  
578 metagenomes from the following three BioProjects: PRJNA478018, PRJNA396840,  
579 and PRJNA398963. Finally, the raw mapping counts were normalized and further  
580 processed and visualized using BiG-MAP.analyse.

581

### 582 **Data availability**

583 The supporting information for this article can be found in the Supplementary material  
584 and in the Zenodo repository (<https://zenodo.org/>) with the following DOI:  
585 10.5281/zenodo.4320501. The metabolomics data used for reanalysis is available  
586 from GNPS-MassIVE accession ID MSV000081832.

587

## 588 **Acknowledgements**

589 We thank Daria Zuzanna Świgoń, Arno Hagenbeek, Sarah van den Broek, Jeanine  
590 Boot and Robert Koetsier for preliminary results on the *pdu* operon, which provided us  
591 the lead to further explore these datasets. We also acknowledge the guidance  
592 provided by Rens Holmer in the early stage of this study and Dr Madeleine Ernst for  
593 her help in locating the relevant files of the relevant metabolomics data files from the  
594 Aleti *et al.* study.

595

## 596 **Funding information**

597 This work was supported by the Chan- Zuckerberg Biohub (M.A.F.), and the U.S.  
598 Defense Advanced Research Projects Agency's Living Foundries program award  
599 HR0011-15- C-0084 (M.A.F. and V.P.A.) and an ASDI eScience grant  
600 (ASDI.2017.030) from the Netherlands eScience Center (J.J.J.v.d.H. and M.H.M.).

601

## 602 **Conflicts of interest**

603 MHM is a co-founder of Design Pharmaceuticals and a member of the scientific  
604 advisory board of Hexagon Bio. M.A.F. is a co-founder and director of Federation Bio,  
605 a co-founder of Revolution Medicines, and a member of the scientific advisory board  
606 of NGM Biopharmaceuticals.

607

## 608 **References**

- 609 1. Donia, M. S. & Fischbach, M. A. Small molecules from the human microbiota.  
610 *Science*. **349**, 395–406 (2015).
- 611 2. Berendsen, R. L., Pieterse, C. M. J. & Bakker, P. A. H. M. The rhizosphere

- 612 microbiome and plant health. *Trends Plant Sci.* **17**, 478–486 (2012).
- 613 3. Hibbing, M. E., Fuqua, C., Parsek, M. R. & Peterson, S. B. Bacterial  
614 competition: surviving and thriving in the microbial jungle. *Nat Rev Microbiol* **8**,  
615 15–25 (2010).
- 616 4. Joseph M. Pickard, Melody Y. Zeng, R. C. Gut Microbiota: Role in Pathogen  
617 Colonization, Immune Responses and Inflammatory Disease. *Immunol Rev.*  
618 **279**, 70–89 (2017).
- 619 5. Garsin, D. A. Ethanolamine Utilization in Bacterial Pathogens: Roles and  
620 Regulation. *Nat Rev Microbiol* **8**, 290–295 (2010).
- 621 6. Tracanna, V., de Jong, A., Medema, M. H. & Kuipers, O. P. Mining prokaryotes  
622 for antimicrobial compounds: From diversity to function. *FEMS Microbiol. Rev.*  
623 **41**, 417–429 (2017).
- 624 7. Mendes, R. *et al.* Deciphering the Rhizosphere Microbiome for Disease-  
625 Suppressive Bacteria. *Science.* **911**, 1–5 (2011).
- 626 8. Brial, F., Le, A., Marc, L., Dumas, E. & Gauguier, D. Implication of gut  
627 microbiota metabolites in cardiovascular and metabolic diseases. *Cell. Mol.*  
628 *Life Sci.* **75**, 3977–3990 (2018).
- 629 9. Fischbach, M. A. Microbiome: Focus on Causation and Mechanism. *Cell* **174**,  
630 785–790 (2018).
- 631 10. Blin, K. *et al.* antiSMASH 5.0: updates to the secondary metabolite genome  
632 mining pipeline. *Nucleic Acids Res* **47**, 81–87 (2019).
- 633 11. Hannigan, G. D. *et al.* A deep learning genome-mining strategy for biosynthetic  
634 gene cluster prediction. *Nucleic Acids Res.* **47**, 110–123 (2019).
- 635 12. Franzosa, E. A. *et al.* Species-level functional profiling of metagenomes and  
636 metatranscriptomes. *Nat. Methods* **15**, 962–968 (2018).

- 637 13. Liu, B. & Pop, M. MetaPath : identifying differentially abundant metabolic  
638 pathways in metagenomic datasets. *BMC Proc.* **5**, 1–12 (2011).
- 639 14. Kim, J., Kim, M. S., Koh, A. Y., Xie, Y. & Zhan, X. FMAP : Functional Mapping  
640 and Analysis Pipeline for metagenomics and metatranscriptomics studies.  
641 *BMC Bioinformatics* **17**, 1–8 (2016).
- 642 15. Martinez, X. *et al.* MetaTrans: an open-source pipeline for  
643 metatranscriptomics. *Sci. Rep.* **6**, 26447 (2016).
- 644 16. Kanehisa, M. KEGG for integration and interpretation of large-scale molecular  
645 data sets. *Nucleic Acids Res.* **40**, 109–114 (2012).
- 646 17. Caspi, R. *et al.* The MetaCyc database of metabolic pathways and enzymes.  
647 *Nucleic Acids Res.* **46**, 633–639 (2018).
- 648 18. Navarro-muñoz, J. C. *et al.* A computational framework to explore large-scale  
649 biosynthetic diversity. *Nat. Chem. Biol.* **16**, 60–68 (2019).
- 650 19. Blin, K. *et al.* antiSMASH 5.0: updates to the secondary metabolite genome  
651 mining pipeline. *Nucleic Acids Res* **47**, 81–87 (2019).
- 652 20. Ondov, B. D. *et al.* Mash: fast genome and metagenome distance estimation  
653 using MinHash. *Genome Biol.* **17**, 1–14 (2016).
- 654 21. Langmead, B. & Salzberg, S. L. Fast gapped-read alignment with Bowtie 2.  
655 *Nat. Methods* **9**, 357–360 (2012).
- 656 22. Paulson, J. N., Stine, O. C., Bravo, H. C. & Pop, M. Differential abundance  
657 analysis for microbial marker-gene surveys. *Nat. Methods* **10**, 1–6 (2013).
- 658 23. Mcdonald, D. *et al.* The Biological Observation Matrix ( BIOM ) format or: how I  
659 learned to stop worrying and love the ome-ome. *Gigascience* **1**, 1–6 (2012).
- 660 24. Zou, Y. *et al.* 1,520 reference genomes from cultivated human gut bacteria  
661 enable functional microbiome analyses. *Nat. Biotechnol.* **37**, 179–187 (2019).

- 662 25. Deo, P. N. & Deshmukh, R. Oral microbiome : Unveiling the fundamentals. *J.*  
663 *Oral Maxillofac. Pathol.* **23**, 122–128 (2019).
- 664 26. Graves, D. T., Corrêa, J. D. & Silva, T. A. The Oral Microbiota Is Modified by  
665 Systemic Diseases. *J. Dent. Res.* **98**, 148 –156 (2019).
- 666 27. Dewhirst, F. E. *et al.* The Human Oral Microbiome. *J. Bacteriol.* **192**, 5002–  
667 5017 (2010).
- 668 28. Garcia, S. S. *et al.* Targeting of *Streptococcus mutans* Biofilms by a Novel  
669 Small Molecule Prevents Dental Caries and Preserves the Oral Microbiome.  
670 *Dent. Res.* **96**, 807–814 (2017).
- 671 29. Edlund, A., Garg, N., Mohimani, H., Gurevich, A. & He, X. Metabolic  
672 Fingerprints from the Human Oral Microbiome Reveal a Vast Knowledge Gap  
673 of Secreted Small Peptidic Molecules. *mSystems* **2**, 1–16 (2017).
- 674 30. Aleti, G. *et al.* Identification of the Bacterial Biosynthetic Gene Clusters of the  
675 Oral Microbiome Illuminates the Unexplored Social Language of Bacteria  
676 during Health and Disease. *MBio* **10**, 1–19 (2019).
- 677 31. Sugimoto, Y., Camacho, F. R., Wang, S., Chankhamjon, P. & Odabas, A. A  
678 metagenomic strategy for harnessing the chemical repertoire of the human  
679 microbiome. *Science*. **366**, 1–17 (2019).
- 680 32. Tang, X. *et al.* Cariogenic *Streptococcus mutans* produces tetramic acid strain-  
681 specific antibiotics that impair commensal colonization Cariogenic  
682 *Streptococcus mutans* produces tetramic acid strain-specific antibiotics that  
683 impair commensal colonization. *ACS Infect. Dis.* **6**, 563–571 (2020).
- 684 33. Mcluskey, K. *et al.* Decomposing metabolite set activity levels with PALS.  
685 *bioRxiv* 1–12 (2020).
- 686 34. Wang, M. Perspective Sharing and community curation of mass spectrometry

- 687 data with Global Natural Products Social Molecular Networking. *Nat.*  
688 *Biotechnol.* **34**, 828–837 (2016).
- 689 35. Tomfohr, J., Lu, J. & Kepler, T. B. Pathway level analysis of gene expression  
690 using singular value decomposition. *BMC Bioinformatics* **11**, 1–11 (2005).
- 691 36. Wang, M. *et al.* Mass spectrometry searches using MASST. *Nat. Biotechnol.*  
692 **38**, 23–26 (2020).
- 693 37. Engels, C. *et al.* Acrolein contributes strongly to antimicrobial and heterocyclic  
694 amine transformation activities of reuterin. *Mol Nutr Food Res.* **6**, 1–13 (2016).
- 695 38. Orita, H. M. *et al.* Comparative Genome Analysis of *Lactobacillus reuteri* and  
696 *Lactobacillus fermentum* Reveal a Genomic Island for Reuterin and Cobalamin  
697 Production. *DNA Res.* **15**, 151–161 (2008).
- 698 39. Stevens, J. F. & Maier, C. S. Acrolein: Sources, metabolism, and biomolecular  
699 interactions relevant to human health and disease. *Mol Nutr Food Res.* **52**, 7–  
700 25 (2008).
- 701 40. Zhang, J., Sturla, S., Lacroix, C. & Schwab, C. Gut Microbial Glycerol  
702 Metabolism as an Endogenous Acrolein. *MBio* **9**, 1–6 (2018).
- 703 41. Shlomo Margel and Erika Wiesel. Acrolein polymerization: Monodisperse,  
704 homo, and hybrid microspheres, synthesis, mechanism, and reactions. *J.*  
705 *Polym. Sci. Polym. Chem. Ed.* **22**, 145–158 (1984).
- 706 42. Nikawa, H. *et al.* *Lactobacillus reuteri* in bovine milk fermented decreases the  
707 oral carriage of mutans streptococci. *Int. J. Food Microbiol.* **95**, 219–223  
708 (2004).
- 709 43. Mi-Sun Kang. Inhibitory effect of *Lactobacillus reuteri* on periodontopathic and  
710 cariogenic bacteria. *J. Microbiol.* **49**, 193–199 (2011).
- 711 44. Phanstiel, D. H., Boyle, A. P., Araya, C. L. & Snyder, M. P. Sushi . R : flexible ,

- 712 quantitative and integrative genomic visualizations for publication-quality multi-  
713 panel figures. *Bioinformatics* **30**, 2808–2810 (2014).
- 714 45. Liu, L., Hao, T., Xie, Z., Horsman, G. P. & Chen, Y. Genome mining unveils  
715 widespread natural product biosynthetic capacity in human oral microbe  
716 *Streptococcus mutans*. *Sci. Rep.* **6**, 1–10 (2016).
- 717 46. Schirmer, M. *et al.* Dynamics of metatranscription in the inflammatory bowel  
718 disease gut microbiome. *Nat. Microbiol.* **3**, 337–346 (2018).
- 719 47. Medema, M. H. *et al.* AntiSMASH: Rapid identification, annotation and analysis  
720 of secondary metabolite biosynthesis gene clusters in bacterial and fungal  
721 genome sequences. *Nucleic Acids Res.* **39**, 339–346 (2011).
- 722 48. Pacheco, L. G. C. Bacterial reference genes for gene expression studies by  
723 RT-qPCR : survey and analysis. *Antonie Van Leeuwenhoek* **108**, 685–693  
724 (2015).
- 725 49. Li, H. *et al.* The Sequence Alignment / Map format and SAMtools.  
726 *Bioinformatics* **25**, 2078–2079 (2009).
- 727 50. Quinlan, A. R. & Hall, I. M. BEDTools : a flexible suite of utilities for comparing  
728 genomic features. *Bioinformatics* **26**, 841–842 (2010).
- 729 51. Angly, F. E., Willner, D., Rohwer, F., Hugenholtz, P. & Tyson, G. W. Grinder : a  
730 versatile amplicon and shotgun sequence simulator. *Nucleic Acids Res.* **40**, 1–  
731 8 (2012).
- 732 52. Gu, Z., Eils, R. & Schlesner, M. Genome analysis Complex heatmaps reveal  
733 patterns and correlations in multidimensional genomic data. *Bioinformatics* **32**,  
734 2847–2849 (2016).
- 735 53. Nothias, L. *et al.* Feature-based molecular networking in the GNPS analysis  
736 environment. *Nat. Methods* **17**, 905–908 (2020).

- 737 54. Patiny, L. & Borel, A. ChemCalc: A Building Block for Tomorrow ' s Chemical  
738 Infrastructure. *J. Chem. Inf. Model.* **53**, 1223–1228 (2012).
- 739 55. Kim, S. *et al.* PubChem 2019 update : improved access to chemical data.  
740 *Nucleic Acids Res.* **47**, 1102–1109 (2019).
- 741 56. Medema, M. H., Takano, E. & Breitling, R. Detecting sequence homology at  
742 the gene cluster level with multigeneblast. *Mol. Biol. Evol.* **30**, 1218–1223  
743 (2013).
- 744 57. Hao, T. *et al.* An anaerobic bacterium host system for heterologous expression  
745 of natural product biosynthetic gene clusters. *Nat. Commun.* **10**, 1–13 (2019).  
746
